# Supplementary material for: Synthetic strategy towards halometallates with imidazo[1,5-a]pyridinium-based counterions
Source: Royal Society of Chemistry journal article supplement (doi:10.1039/d0ce00018c), 2020-01-01
Supplement: d0ce00018c1.pdf [file d0ce00018c1.pdf]

**Synthetic strategy towards halometallates with imidazo[1,5-*a*]pyridinium-based counterion: structural chemistry of low-dimensional Zn(II) and Pb(II) hybrids. *Meso* structure of a Pd(II) by-product enforced by transient bis-hemiaminal**

Olga Yu. Vassilyeva,<sup>\*a</sup> Elena A. Buvaylo,<sup>a</sup> Dmytro S. Nesterov,<sup>b</sup> Vladimir V. Trachevsky,<sup>c</sup> and Brian W. Skelton<sup>d</sup>

Supplementary data

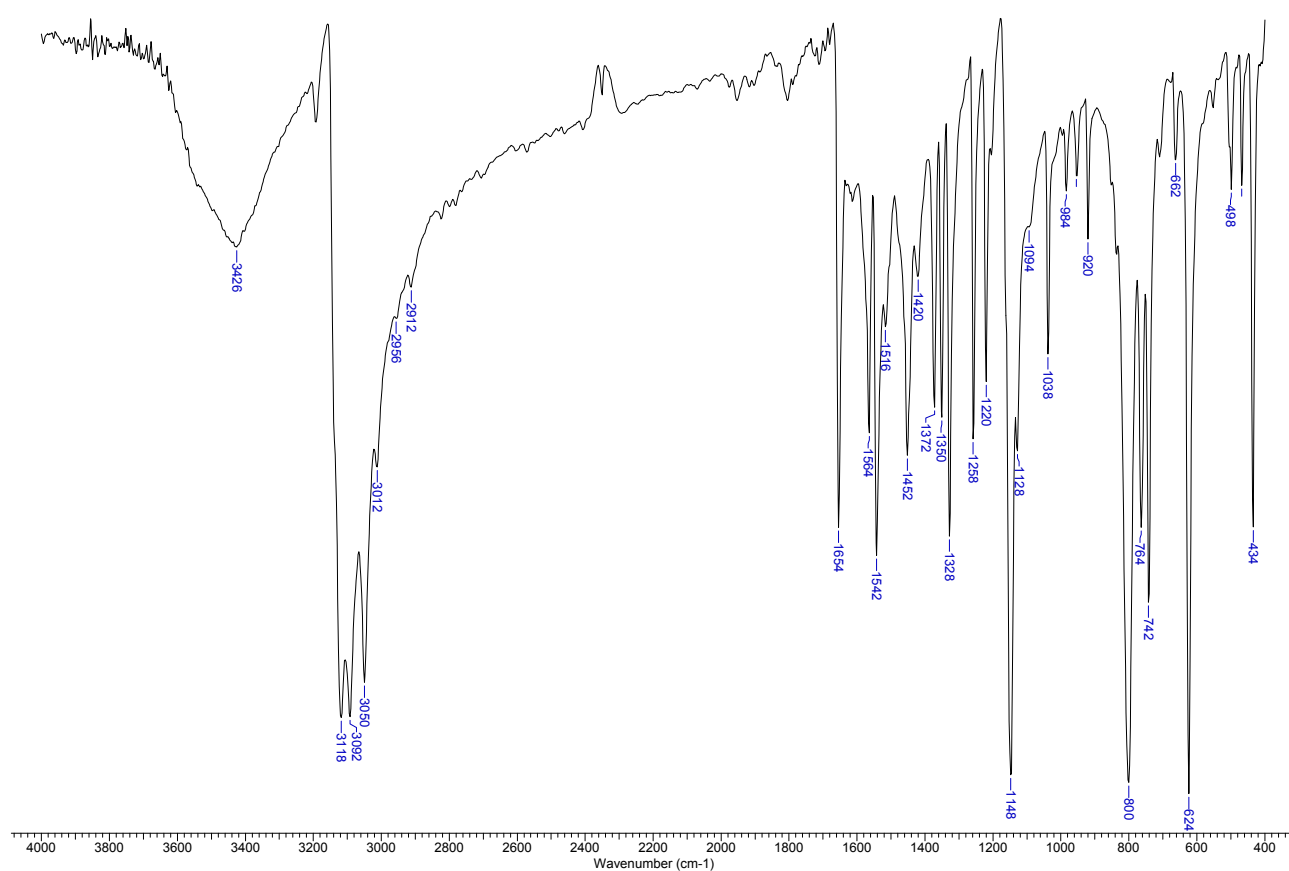

**Fig. S1** IR spectrum of [L']<sub>2</sub>[ZnCl<sub>4</sub>] (1).

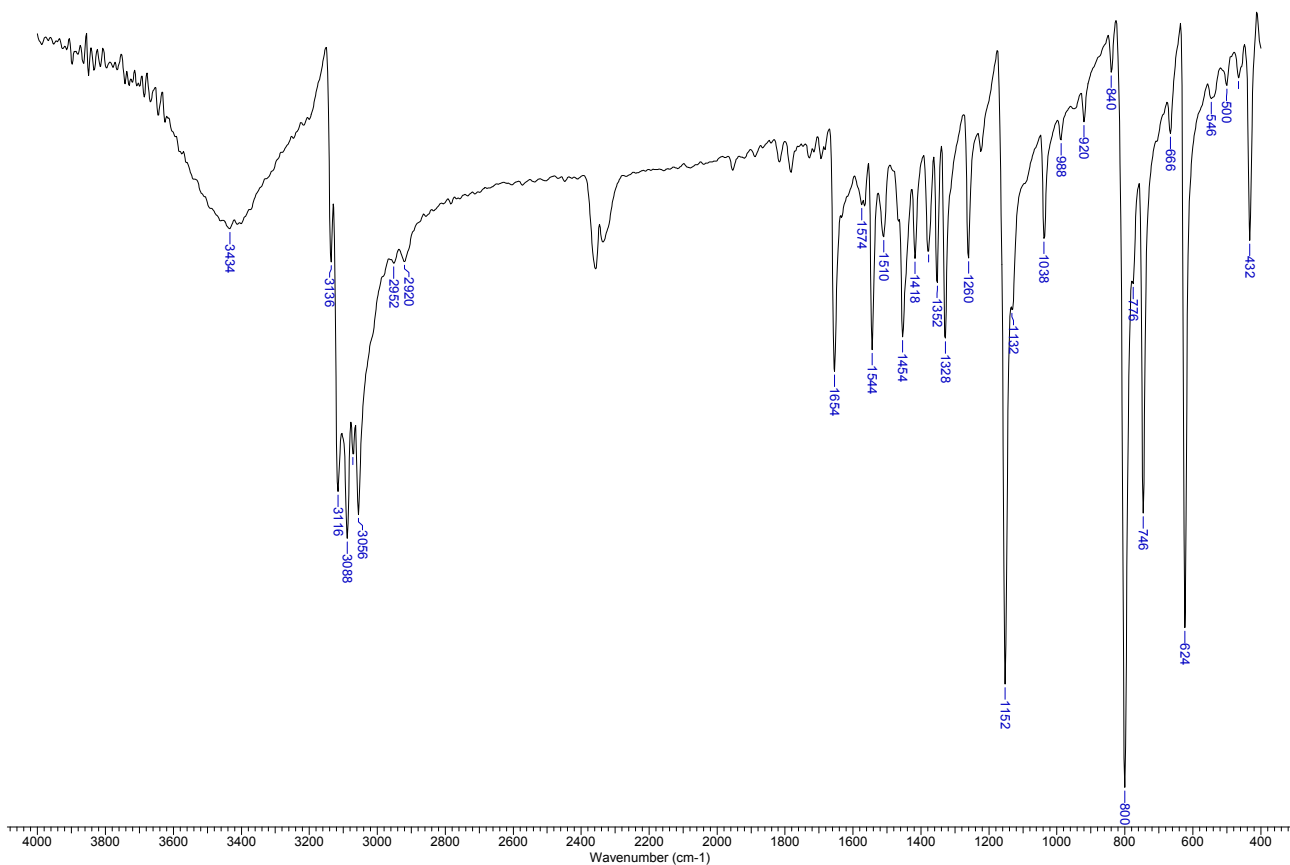

Fig. S2 IR spectrum of  $[L']_n[PbCl_3]_{n\infty}$  (2).

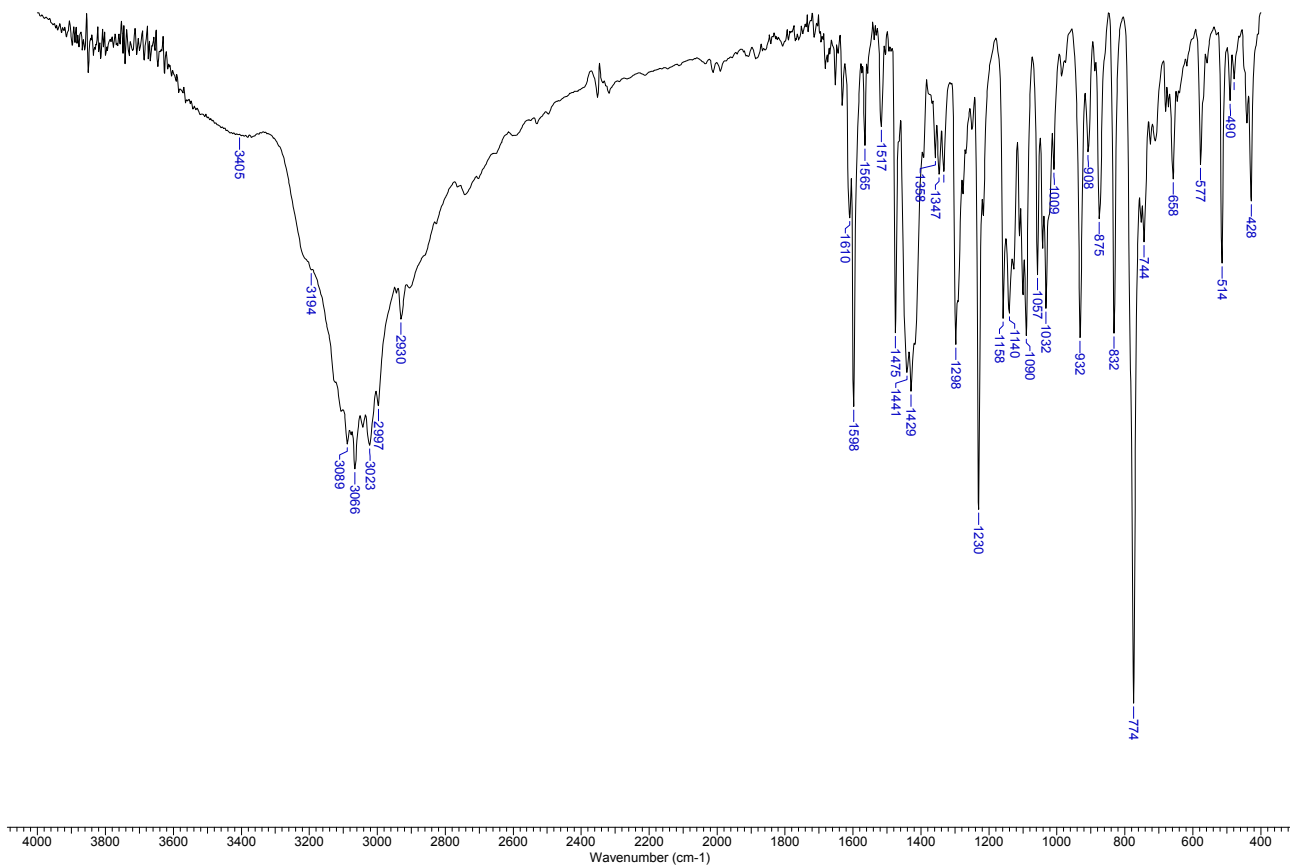

Fig. S3 IR spectrum of  $[PdCl_4]Cl$  (3a).

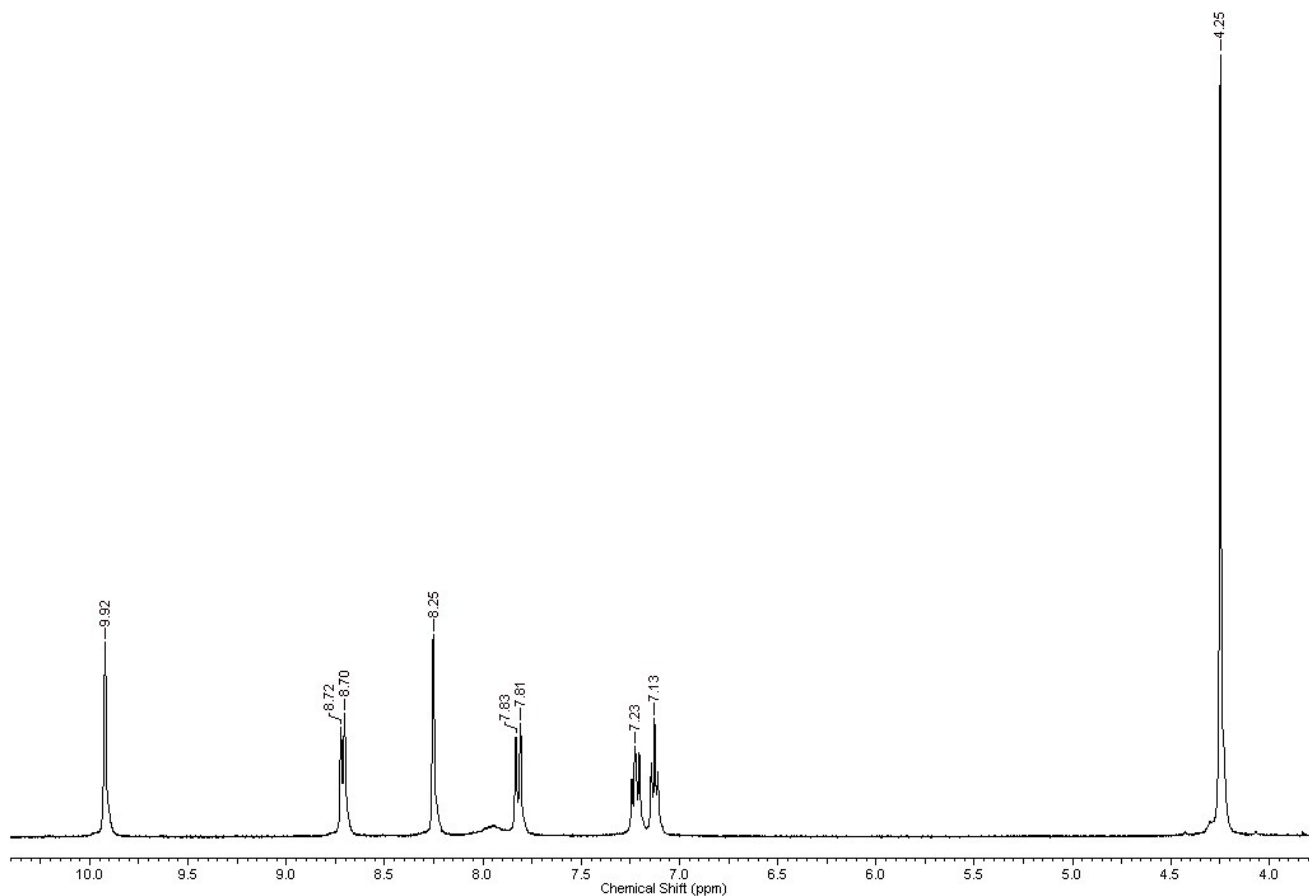

**Fig. S4** <sup>1</sup>H NMR spectrum at 400 MHz (r.t., DMSO-*d*<sub>6</sub>) of [L']<sub>2</sub>[ZnCl<sub>4</sub>] (**1**) in the 10.5–3.5 ppm range.

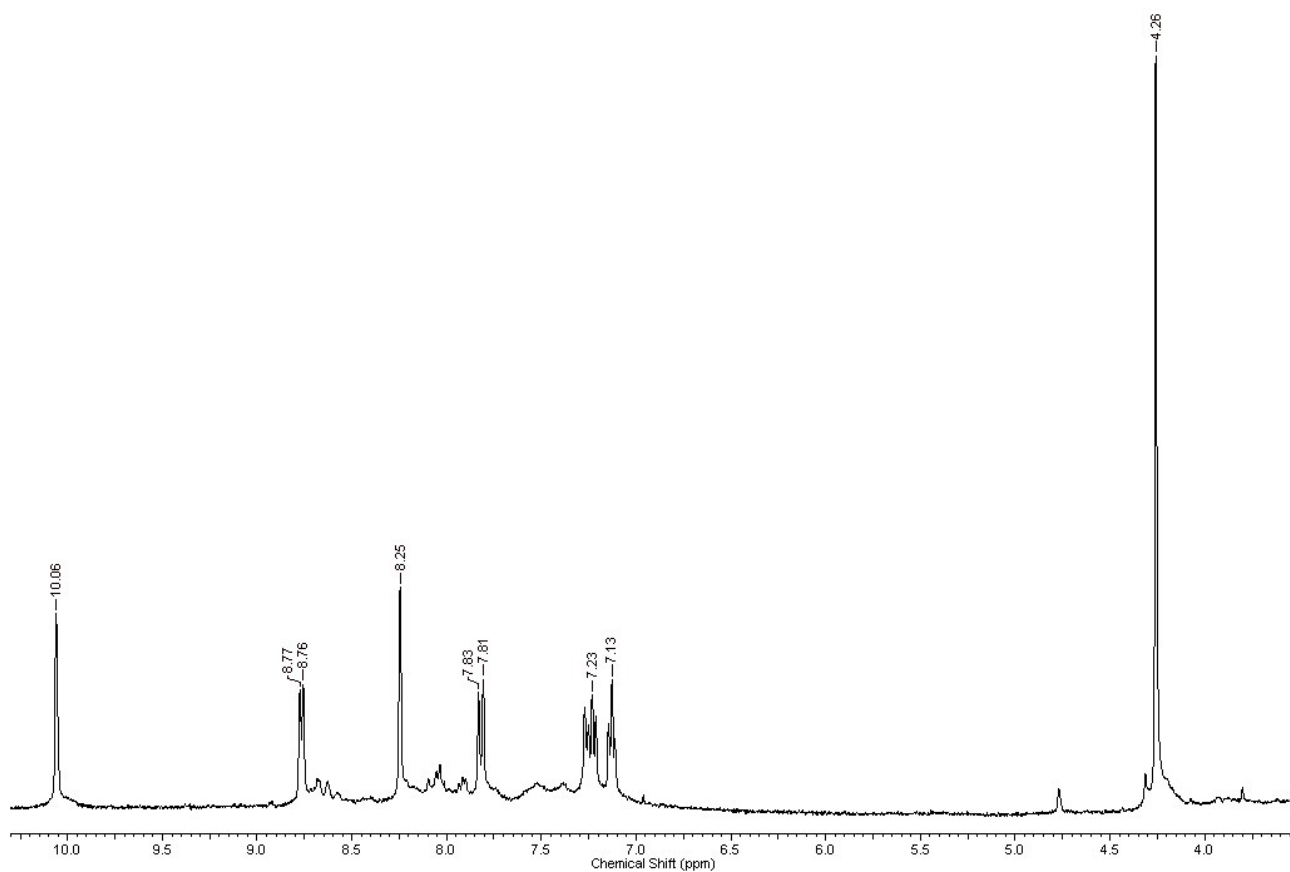

**Fig. S5** <sup>1</sup>H NMR spectrum at 400 MHz (r.t., DMSO-*d*<sub>6</sub>) of [L']<sub>n</sub>[PbCl<sub>3</sub>]<sub>n∞</sub> (**2**) in the 10.5–3.5 ppm range.

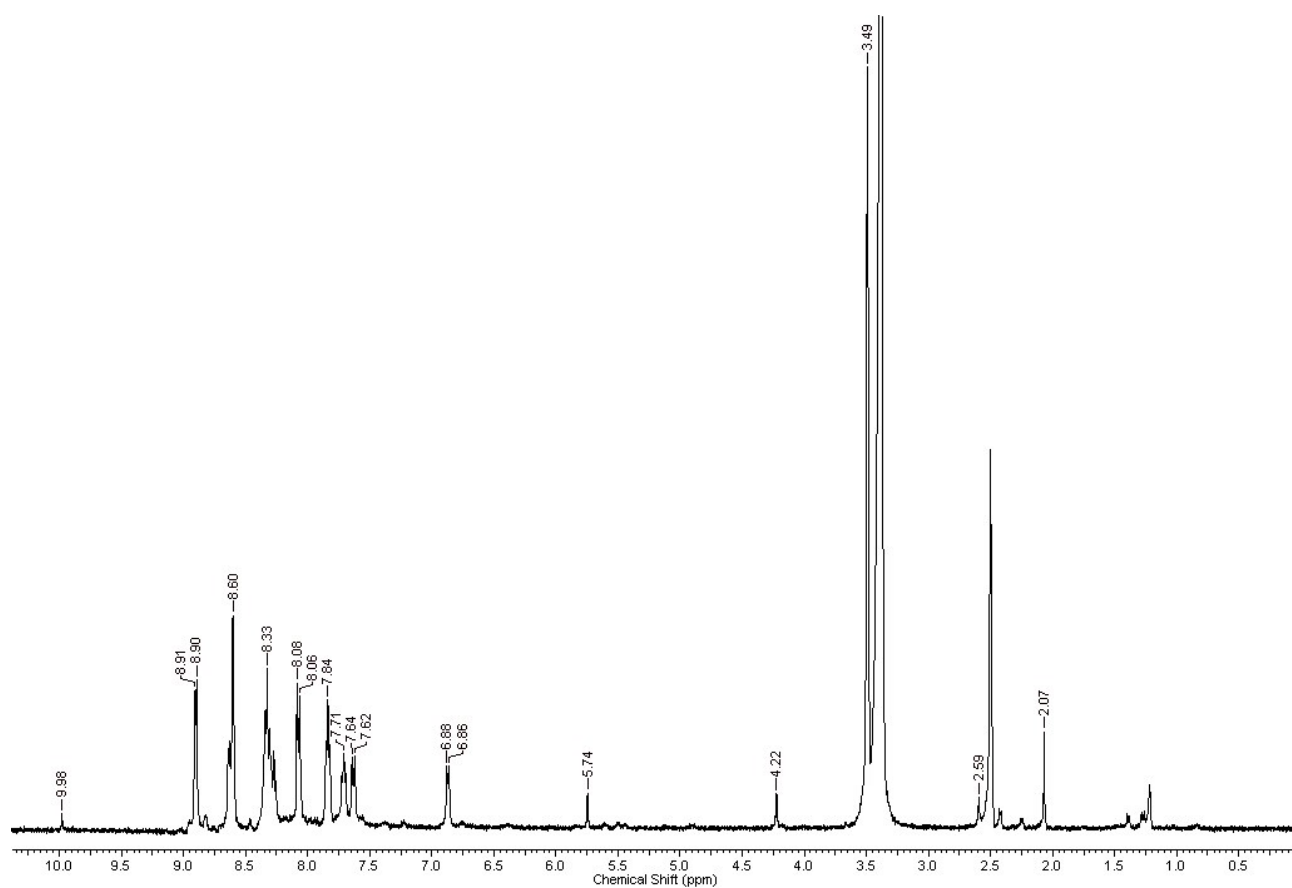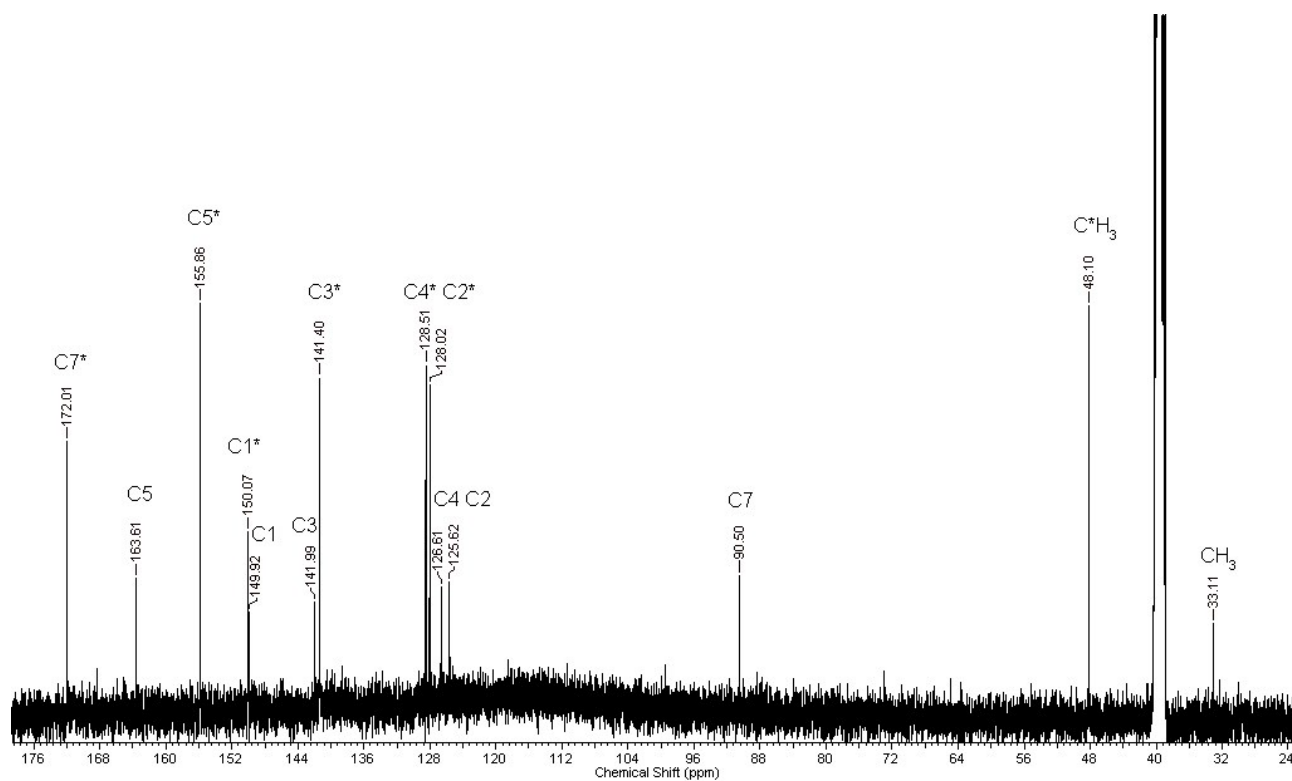

**Fig. S6**  $^1\text{H}$  NMR (top) and  $^{13}\text{C}$  NMR spectra (bottom) at 400 MHz (r.t.,  $\text{DMSO-}d_6$ ) of **3a** showing superposition of the signals of  $[\text{PdCl}^{\text{I}}]\text{Cl}$  (**3**) and  $\text{Pd}(\text{L}_{\text{Schiff}})\text{Cl}_2$  (NEKYUZ).
